# Supplementary material for: Heat Shock-Related Protein Responses and Inflammatory Protein Changes Are Associated with Mild Prolonged Hypoglycemia
Source: MDPI journal article supplement (doi:10.3390/cells10113109), 2021-11-10
Supplement: s1 [file s1]

**Figure S1. Proteins that did not differ between T2D and controls or within groups at differing timepoints**

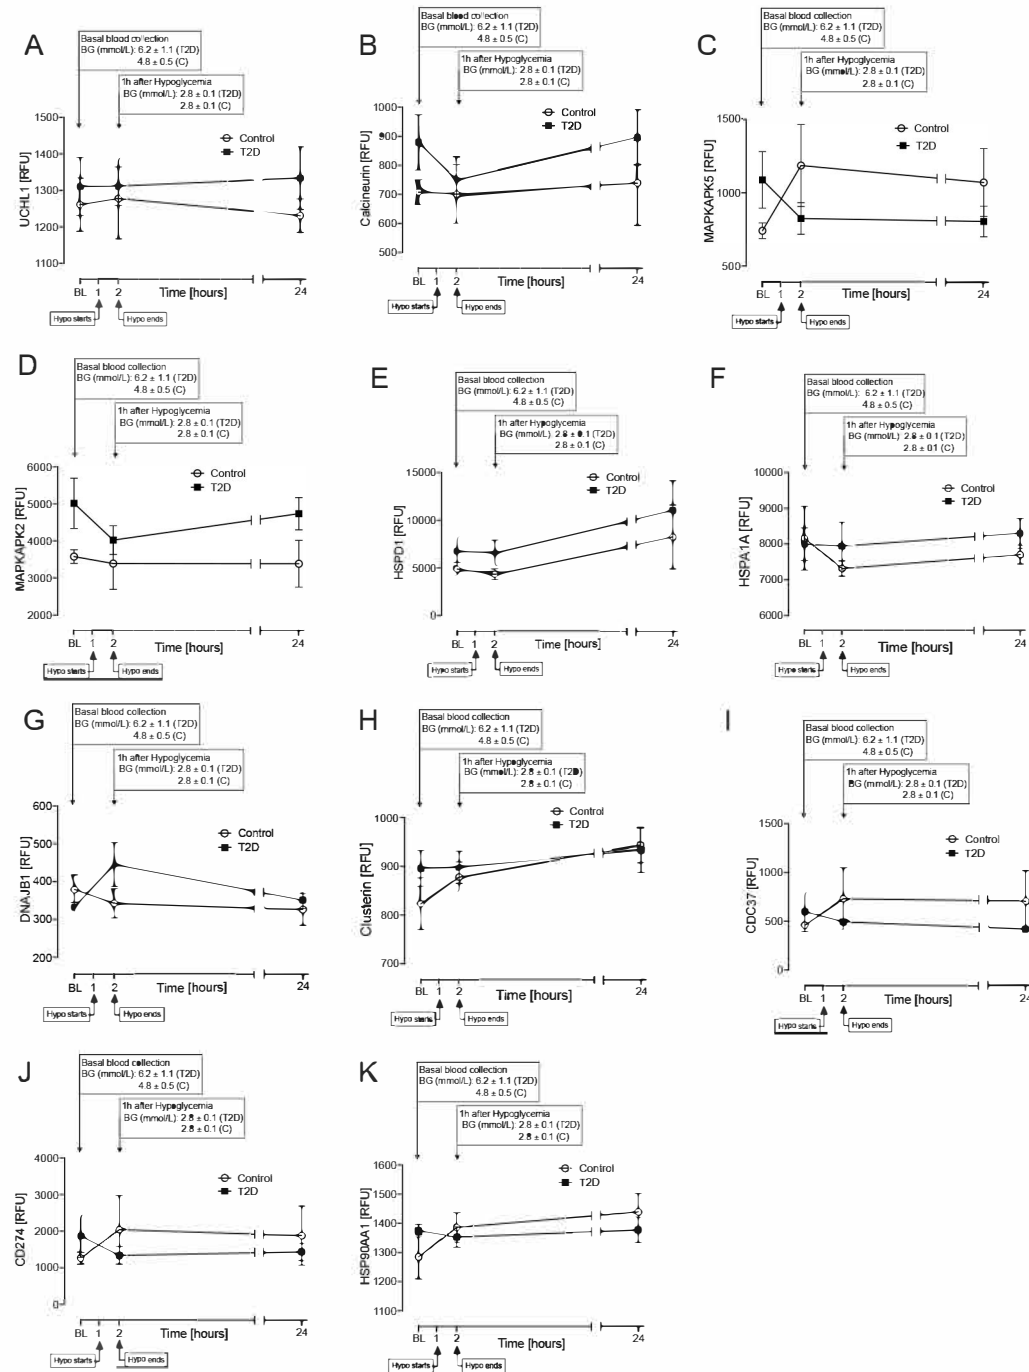

Figure S2. Negative correlation of HSPA1A with urinary isoprostane.

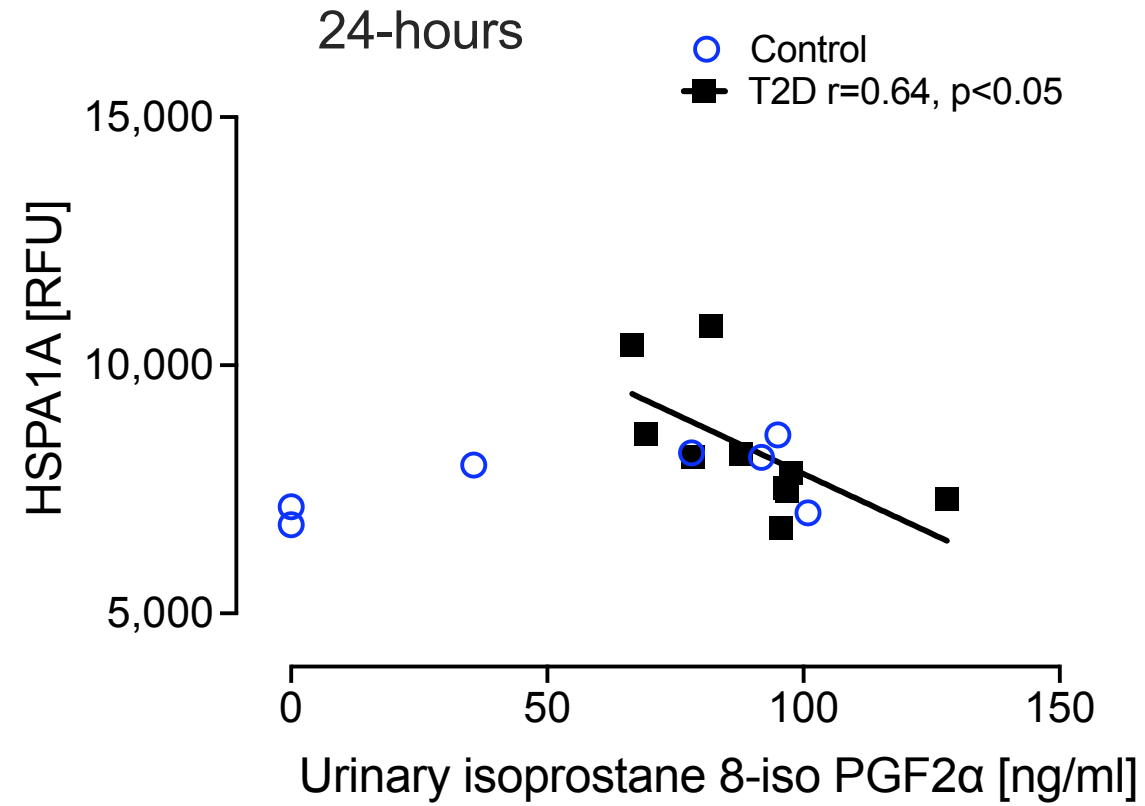

**Table S1.** Inflammatory protein panel for all proteins for the type 2 diabetes patients, p value and fdr values (<0.05 for fdr was considered significant) (17).

| Target Full Name                                              | P      | fd     |
|---------------------------------------------------------------|--------|--------|
| C-X-C motif chemokine 10                                      | 0.0003 | 0.0196 |
| Interleukin-5                                                 | 0.0003 | 0.0196 |
| Azuocidin                                                     | 0.0006 | 0.0268 |
| C-type lectin domain family 7 member A                        | 0.0008 | 0.0268 |
| Serine/threonine-protein kinase TBK1                          | 0.0012 | 0.0308 |
| Protein kinase C zeta type                                    | 0.0017 | 0.0308 |
| Ribosomal protein S6 kinase alpha-5                           | 0.0017 | 0.0308 |
| CD40 ligand                                                   | 0.0017 | 0.0308 |
| Interleukin-34                                                | 0.0020 | 0.0311 |
| High mobility group protein B1                                | 0.0022 | 0.0311 |
| Protein S100-A9                                               | 0.0028 | 0.0361 |
| Interleukin-1 beta                                            | 0.0041 | 0.0430 |
| C-C motif chemokine 19                                        | 0.0042 | 0.0430 |
| Sialoadhesin                                                  | 0.0043 | 0.0430 |
| Interleukin-10 receptor subunit beta                          | 0.0047 | 0.0439 |
| Fractalkine                                                   | 0.0084 | 0.0745 |
| Complement C3b, inactivated                                   | 0.0091 | 0.0754 |
| C-X-C motif chemokine 5                                       | 0.0109 | 0.0851 |
| Protein DJ-1                                                  | 0.0115 | 0.0851 |
| Tumor necrosis factor receptor superfamily member 11A         | 0.0147 | 0.1034 |
| C-C motif chemokine 7                                         | 0.0175 | 0.1174 |
| Interferon alpha-2                                            | 0.0249 | 0.1589 |
| Tumor necrosis factor receptor superfamily member 19L         | 0.0259 | 0.1589 |
| Lymphotactin                                                  | 0.0297 | 0.1744 |
| C-C motif chemokine 20                                        | 0.0333 | 0.1802 |
| Tumor necrosis factor receptor superfamily member 21          | 0.0346 | 0.1802 |
| Tumor necrosis factor receptor superfamily member 11B         | 0.0352 | 0.1802 |
| Toll-like receptor 4:Lymphocyte antigen 96 complex            | 0.0366 | 0.1802 |
| Interleukin-37                                                | 0.0371 | 0.1802 |
| C-C motif chemokine 1                                         | 0.0383 | 0.1802 |
| Interleukin-17B                                               | 0.0411 | 0.1869 |
| C-C motif chemokine 15                                        | 0.0494 | 0.2178 |
| C-C motif chemokine 4-like                                    | 0.0516 | 0.2206 |
| Interleukin-23 receptor                                       | 0.0532 | 0.2206 |
| Transforming growth factor beta-1                             | 0.0623 | 0.2448 |
| Growth-regulated alpha protein                                | 0.0662 | 0.2448 |
| Advanced glycosylation end product-specific receptor, soluble | 0.0663 | 0.2448 |
| Prostaglandin G/H synthase 2                                  | 0.0673 | 0.2448 |
| Toll-like receptor 2                                          | 0.0677 | 0.2448 |

|                                                                                                                                               |        |        |
|-----------------------------------------------------------------------------------------------------------------------------------------------|--------|--------|
| Oxidized low-density lipoprotein receptor 1                                                                                                   | 0.0718 | 0.2530 |
| Insulin-like growth factor-binding protein 4                                                                                                  | 0.0797 | 0.2741 |
| C-C motif chemokine 3-like 1                                                                                                                  | 0.0908 | 0.3050 |
| Phosphatidylinositol 4,5-bisphosphate 3-kinase catalytic subunit alpha isoform:Phosphatidylinositol 3-kinase regulatory subunit alpha complex | 0.0946 | 0.3103 |
| Tumor necrosis factor receptor superfamily member 1B                                                                                          | 0.0969 | 0.3106 |
| Interleukin-17D                                                                                                                               | 0.1235 | 0.3793 |
| Lymphocyte antigen 86                                                                                                                         | 0.1264 | 0.3793 |
| EGF-like module-containing mucin-like hormone receptor-like 2                                                                                 | 0.1264 | 0.3793 |
| Interleukin-6                                                                                                                                 | 0.1468 | 0.4313 |
| Eotaxin                                                                                                                                       | 0.1678 | 0.4758 |
| Endothelial monocyte-activating polypeptide 2                                                                                                 | 0.1687 | 0.4758 |
| Interleukin-2 receptor subunit alpha                                                                                                          | 0.1725 | 0.4770 |
| Interleukin-23                                                                                                                                | 0.1831 | 0.4964 |
| Tumor necrosis factor receptor superfamily member 1A                                                                                          | 0.1970 | 0.5160 |
| C-C motif chemokine 24                                                                                                                        | 0.1976 | 0.5160 |
| C-C motif chemokine 3                                                                                                                         | 0.2030 | 0.5204 |
| Tumor necrosis factor receptor superfamily member 9                                                                                           | 0.2126 | 0.5354 |
| Tumor necrosis factor receptor superfamily member 8                                                                                           | 0.2183 | 0.5400 |
| Interleukin-1 receptor-like 2                                                                                                                 | 0.2284 | 0.5554 |
| Hepatitis A virus cellular receptor 2                                                                                                         | 0.2374 | 0.5628 |
| Interleukin-22                                                                                                                                | 0.2431 | 0.5628 |
| Lysozyme C                                                                                                                                    | 0.2479 | 0.5628 |
| CD5 antigen-like                                                                                                                              | 0.2504 | 0.5628 |
| C-reactive protein                                                                                                                            | 0.2515 | 0.5628 |
| C-C motif chemokine 14                                                                                                                        | 0.2578 | 0.5680 |
| C3a anaphylatoxin des Arginine                                                                                                                | 0.2656 | 0.5687 |
| Ras-related C3 botulinum toxin substrate 1                                                                                                    | 0.2684 | 0.5687 |
| C5a anaphylatoxin                                                                                                                             | 0.2702 | 0.5687 |
| P-Selectin                                                                                                                                    | 0.2751 | 0.5704 |
| Interleukin-10                                                                                                                                | 0.2812 | 0.5747 |
| C-C motif chemokine 13                                                                                                                        | 0.2913 | 0.5789 |
| Ck-beta-8-1                                                                                                                                   | 0.2927 | 0.5789 |
| Complement C3                                                                                                                                 | 0.2956 | 0.5789 |
| C-C motif chemokine 18                                                                                                                        | 0.3089 | 0.5921 |
| Thrombospondin-1                                                                                                                              | 0.3167 | 0.5921 |
| Interleukin-17F                                                                                                                               | 0.3234 | 0.5921 |
| Tumor necrosis factor receptor superfamily member 18                                                                                          | 0.3245 | 0.5921 |
| Interleukin-8                                                                                                                                 | 0.3252 | 0.5921 |
| C3a anaphylatoxin                                                                                                                             | 0.3276 | 0.5921 |
| Complement C3b                                                                                                                                | 0.3357 | 0.5921 |
| C-C motif chemokine 2                                                                                                                         | 0.3359 | 0.5921 |
| Kininogen-1                                                                                                                                   | 0.3491 | 0.6077 |
| Tyrosine-protein kinase HCK                                                                                                                   | 0.3582 | 0.6160 |
| Complement C3d fragment                                                                                                                       | 0.3739 | 0.6313 |
| C-X-C motif chemokine 6                                                                                                                       | 0.3761 | 0.6313 |

|                                                                                |        |        |
|--------------------------------------------------------------------------------|--------|--------|
| Protein kinase C theta type                                                    | 0.3962 | 0.6511 |
| C-C motif chemokine 21                                                         | 0.4014 | 0.6511 |
| C-C motif chemokine 25                                                         | 0.4054 | 0.6511 |
| MAP kinase-activated protein kinase 2                                          | 0.4118 | 0.6511 |
| Interleukin-27                                                                 | 0.4153 | 0.6511 |
| C-C motif chemokine 17                                                         | 0.4192 | 0.6511 |
| C-X-C motif chemokine 13                                                       | 0.4202 | 0.6511 |
| C-C motif chemokine 22                                                         | 0.4628 | 0.7030 |
| Interleukin-13                                                                 | 0.4637 | 0.7030 |
| PSA:alpha-1-antichymotrypsin complex                                           | 0.4750 | 0.7121 |
| Tumor necrosis factor                                                          | 0.4828 | 0.7121 |
| C-X-C motif chemokine 11                                                       | 0.4850 | 0.7121 |
| Bone morphogenetic protein 6                                                   | 0.4936 | 0.7121 |
| Neutrophil-activating peptide 2                                                | 0.4961 | 0.7121 |
| C-C motif chemokine 8                                                          | 0.5000 | 0.7121 |
| Tumor necrosis factor receptor superfamily member 4                            | 0.5145 | 0.7228 |
| Retinoic acid receptor responder protein 2                                     | 0.5177 | 0.7228 |
| Peroxiredoxin-5, mitochondrial                                                 | 0.5280 | 0.7270 |
| Interleukin-17A                                                                | 0.5351 | 0.7270 |
| Tumor necrosis factor receptor superfamily member 10A                          | 0.5375 | 0.7270 |
| Macrophage colony-stimulating factor 1                                         | 0.5414 | 0.7270 |
| Tumor necrosis factor receptor superfamily member 14                           | 0.5558 | 0.7364 |
| Alpha-1-antichymotrypsin                                                       | 0.5642 | 0.7364 |
| CD27 antigen                                                                   | 0.5660 | 0.7364 |
| Macrophage colony-stimulating factor 1 receptor                                | 0.5735 | 0.7364 |
| Phosphatidylinositol 4,5-bisphosphate 3-kinase catalytic subunit gamma isoform | 0.5791 | 0.7364 |
| Calcium/calmodulin-dependent protein kinase type 1D                            | 0.5830 | 0.7364 |
| Connective tissue-activating peptide III                                       | 0.5850 | 0.7364 |
| Natural cytotoxicity triggering receptor 3                                     | 0.5961 | 0.7396 |
| Tumor necrosis factor receptor superfamily member 3                            | 0.5980 | 0.7396 |
| C-C motif chemokine 23                                                         | 0.6254 | 0.7618 |
| Complement C5b-C6 complex                                                      | 0.6267 | 0.7618 |
| Platelet factor 4                                                              | 0.6351 | 0.7653 |
| CD97 antigen                                                                   | 0.6429 | 0.7683 |
| E-Selectin                                                                     | 0.6499 | 0.7701 |
| Mast/stem cell growth factor receptor Kit                                      | 0.6754 | 0.7879 |
| Complement C4b                                                                 | 0.6762 | 0.7879 |
| Macrophage migration inhibitory factor                                         | 0.6930 | 0.8009 |
| Annexin A1                                                                     | 0.7091 | 0.8129 |
| Interleukin-1 alpha                                                            | 0.7208 | 0.8196 |
| Complement C4                                                                  | 0.7453 | 0.8406 |
| C-C motif chemokine 16                                                         | 0.7713 | 0.8631 |
| Interleukin-1 Receptor accessory protein                                       | 0.7827 | 0.8690 |
| Interleukin-18 receptor accessory protein                                      | 0.8035 | 0.8771 |
| Complement C5                                                                  | 0.8075 | 0.8771 |

|                                                      |        |        |
|------------------------------------------------------|--------|--------|
| Tyrosine-protein kinase Lyn, isoform B               | 0.8087 | 0.8771 |
| Allograft inflammatory factor 1                      | 0.8225 | 0.8811 |
| Sphingosine kinase 1                                 | 0.8249 | 0.8811 |
| Extracellular matrix protein 1                       | 0.8390 | 0.8895 |
| Tumor necrosis factor receptor superfamily member 25 | 0.8612 | 0.9062 |
| Tumor necrosis factor ligand superfamily member 4    | 0.8930 | 0.9327 |
| Tumor necrosis factor receptor superfamily member 6B | 0.9051 | 0.9370 |
| Carbohydrate sulfotransferase 2                      | 0.9104 | 0.9370 |
| C-C motif chemokine 5                                | 0.9285 | 0.9466 |
| Tyrosine-protein kinase Lyn                          | 0.9331 | 0.9466 |
| Group IIE secretory phospholipase A2                 | 0.9576 | 0.9644 |
| Tumor necrosis factor-inducible gene 6 protein       | 0.9710 | 0.9710 |
